# Supplementary material for: Production of Terretonin N and Butyrolactone I by Thermophilic Aspergillus terreus TM8 Promoted Apoptosis and Cell Death in Human Prostate and Ovarian Cancer Cells
Source: MDPI journal article supplement (doi:10.3390/molecules26092816), 2021-05-10
Supplement: s1 [file s1]

# Supporting Information

Production of Terretonin N and Butyrolactone I by Thermophilic *Aspergillus terreus* TM8 promoted apoptosis and cell death in human prostate and ovarian cancer cells

Ayman A. Ghfar<sup>1\*</sup>, Mohammad Magdy El-Metwally<sup>2</sup>, Mohamed Shaaban<sup>3</sup>, Sami A. Gabr<sup>4</sup>, Nada S. Gabr<sup>5</sup>, Marwa S. M. Diab<sup>6</sup>, Ahmad Aqel<sup>1</sup>, Mohamed A. Habila<sup>1</sup>, Wahidah H. Al-Qahtani<sup>7</sup>, Mohamed Y. Alfaifi<sup>8</sup>, Serag Eldin I. Elbehairi<sup>8,9,\*</sup>, Bayan Ahmed AlJumah<sup>10</sup>

<sup>1</sup> Advanced material Research Chair, Chemistry Department P. O. Box 2455, College of Science, King Saud University, Riyadh 11451, Saudi Arabia.

<sup>2</sup> Botany and Microbiology Department, Faculty of Science, Damanhour University, Damanhour, Egypt.

<sup>3</sup> Chemistry of Natural Compounds Department, Division of Pharmaceutical Industries, National Research Centre, El-Beheos St. 33, Dokki-Cairo 12622, Egypt

<sup>4</sup> Department of Anatomy, Faculty of Medicine, Mansoura University, Mansoura, Egypt

<sup>5</sup> Faculty of Medicine, Mansoura University, Mansoura, Egypt

<sup>6</sup> Molecular Drug Evaluation Department, National Organization for Drug Control & Research (NODCAR), Giza 12553, Egypt

<sup>7</sup> Department of Food Sciences & Nutrition, College of Food & Agriculture Sciences, King Saud University, Riyadh, Saudi Arabia

<sup>8</sup> Biology Department, Faculty of Science, King Khalid University, Abha 9004, Saudi Arabia.

<sup>9</sup> Cell Culture Lab, Egyptian Organization for Biological Products and Vaccines (VACSERA Holding Company), 51 Wezaret El-Zeraa St., Agouza, Giza, Egypt.

<sup>10</sup> Department of Pharmaceutical Practice, College of Pharmacy, Princess Nourahbint Abdulrahman University, Riyadh 11671, Saudi Arabia

\* Correspondence: Ayman Ghfar, Chemistry Department, College of Science, King Saud University, Riyadh-11451, Kingdom of Saudi Arabia. Tel: + 966545757290, E-mail: aymanghfar@gmail.com; Serag Eldin I. Elbehairi, Biology Department, Faculty of Science, King Khalid University, Abha 9004, Saudi Arabia. E-mail: seragalone@gmail.com.

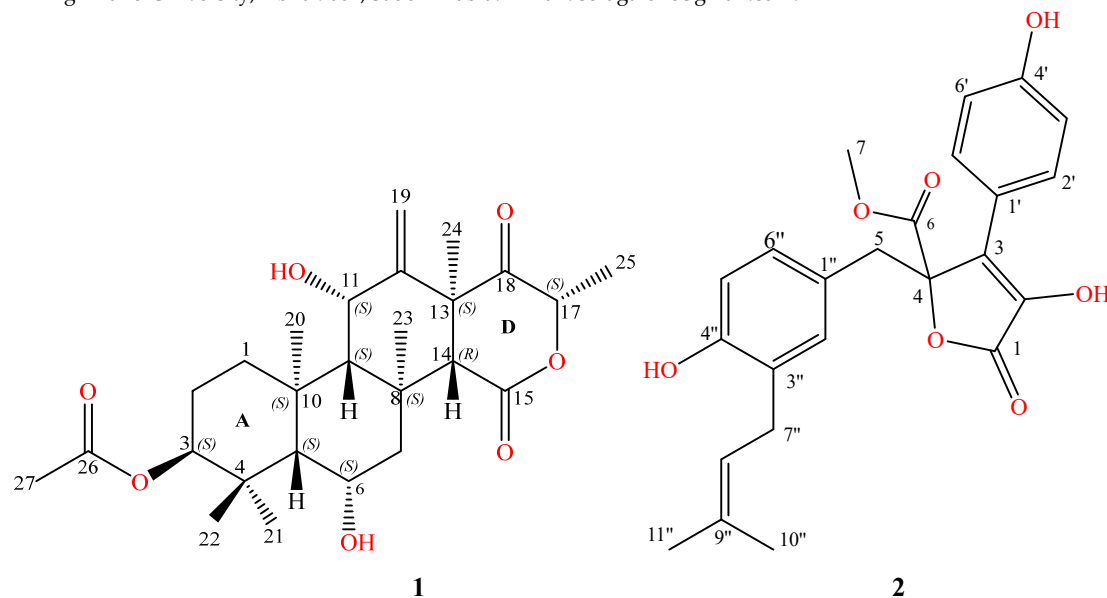

| <b>Table of Contents:</b>                                                                                                                            | <b>Page</b> |
|------------------------------------------------------------------------------------------------------------------------------------------------------|-------------|
| Physico-properties of terretonin N ( <b>2</b> ) and butyrolactone I ( <b>2</b> )                                                                     | S3          |
| <b>Figure S1-S10:</b> MS and NMR spectral data of terretonin N ( <b>1</b> )                                                                          | S4-S13      |
| <b>Figure S11:</b> COSY (—) and key HMBC (↷) correlations of terretonin N ( <b>1</b> )                                                               | S14         |
| <b>Table S1:</b> <sup>13</sup> C (125 MHz) and <sup>1</sup> H (500 MHz) NMR data of terretonin N ( <b>1</b> ) in CDCl <sub>3</sub>                   | S14         |
| <b>Figure S12-S17:</b> MS and NMR spectral data of butyrolactone I ( <b>2</b> )                                                                      | S15-S20     |
| <b>Figure S18:</b> H,H COSY (—) and selected HMBC (↷) correlations of butyrolactone I ( <b>2</b> )                                                   | S21         |
| <b>Table S2:</b> <sup>13</sup> C (125 MHz) and <sup>1</sup> H (500 MHz) NMR data of butyrolactone I ( <b>2</b> ) in Acetone- <i>d</i> <sub>6</sub> : | S21         |

## Physico-properties of terretonin N (2) and butyrolactone I (2)

### Terretonin N (1)

C<sub>26</sub>H<sub>38</sub>O<sub>7</sub> (462), colorless solid, *R<sub>f</sub>* = 0.54 (CH<sub>2</sub>Cl<sub>2</sub>/ 5% MeOH), UV non absorbing-absorbing (254 nm) or fluorescence, pink and later as violet staining with anisaldehyde/sulfuric acid.  $[\alpha]_{\text{D}}^{20}$  114 (*c*= 0.1, MeOH). <sup>1</sup>H NMR (500 MHz, CDCl<sub>3</sub>, see Table S1), <sup>13</sup>C NMR (125 MHz, CDCl<sub>3</sub>, see Table S1). (+)-ESI MS: *m/z* (%) = 485 ([M+Na]<sup>+</sup>, 100), 947 ([2M+Na]<sup>+</sup>, 0.58). (-)-ESI MS: *m/z* (%) = 461 ([M-H]<sup>-</sup>, 62), 891 ([2M-H]<sup>-</sup>, 4), (-)-ESI-HRMS: *m/z* = 461.2547 [M-H]<sup>+</sup> (Calc. 461.2545 for C<sub>26</sub>H<sub>37</sub>O<sub>7</sub>).

### Butyrolactone I (2)

C<sub>24</sub>H<sub>24</sub>O<sub>7</sub> (424), colorless solid, *R<sub>f</sub>* = 0.43 (CH<sub>2</sub>Cl<sub>2</sub>/ 7% MeOH), UV absorbing (254 nm), intense violet staining with anisaldehyde/sulfuric acid. <sup>1</sup>H NMR (500 MHz, Acetone-d<sub>6</sub>), <sup>13</sup>C NMR (125 MHz, Acetone-d<sub>6</sub>), see Table (3). (+)-ESI MS: *m/z* (%) = 447 ([M+Na]<sup>+</sup>, 81), 871 ([2M+Na]<sup>+</sup>, 100). (-)-ESI MS: *m/z* (%) = 423 ([M-H]<sup>-</sup>, 13), 847 ([2M-H]<sup>-</sup>, 4), (+)-ESI-HRMS: *m/z* = 447.1414 [M+Na]<sup>+</sup> (Calc. 447.1414 for C<sub>24</sub>H<sub>24</sub>NaO<sub>7</sub>), (-)-ESI-HRMS: *m/z* = 423.1435 [M-H]<sup>-</sup> ( calc. 423.1449 for C<sub>24</sub>H<sub>23</sub>O<sub>7</sub>).

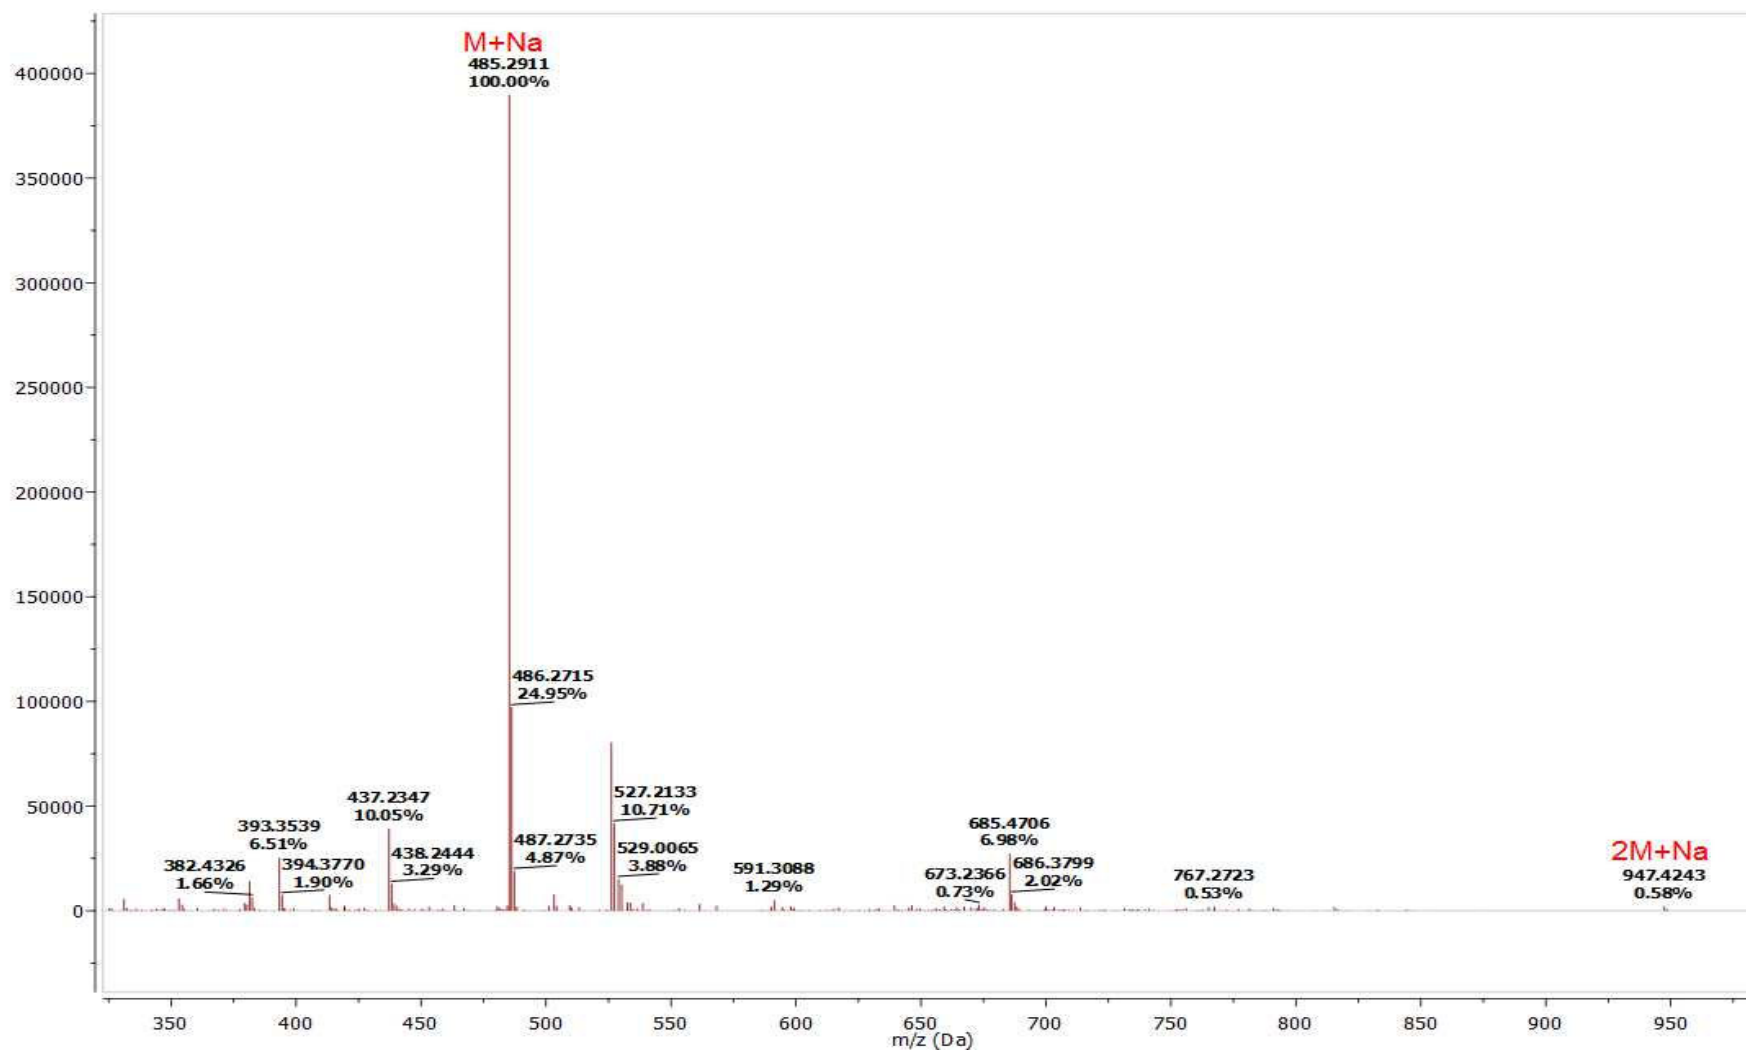

**Figure S1:** (+)-ESIMS of terretonin N (**1**)

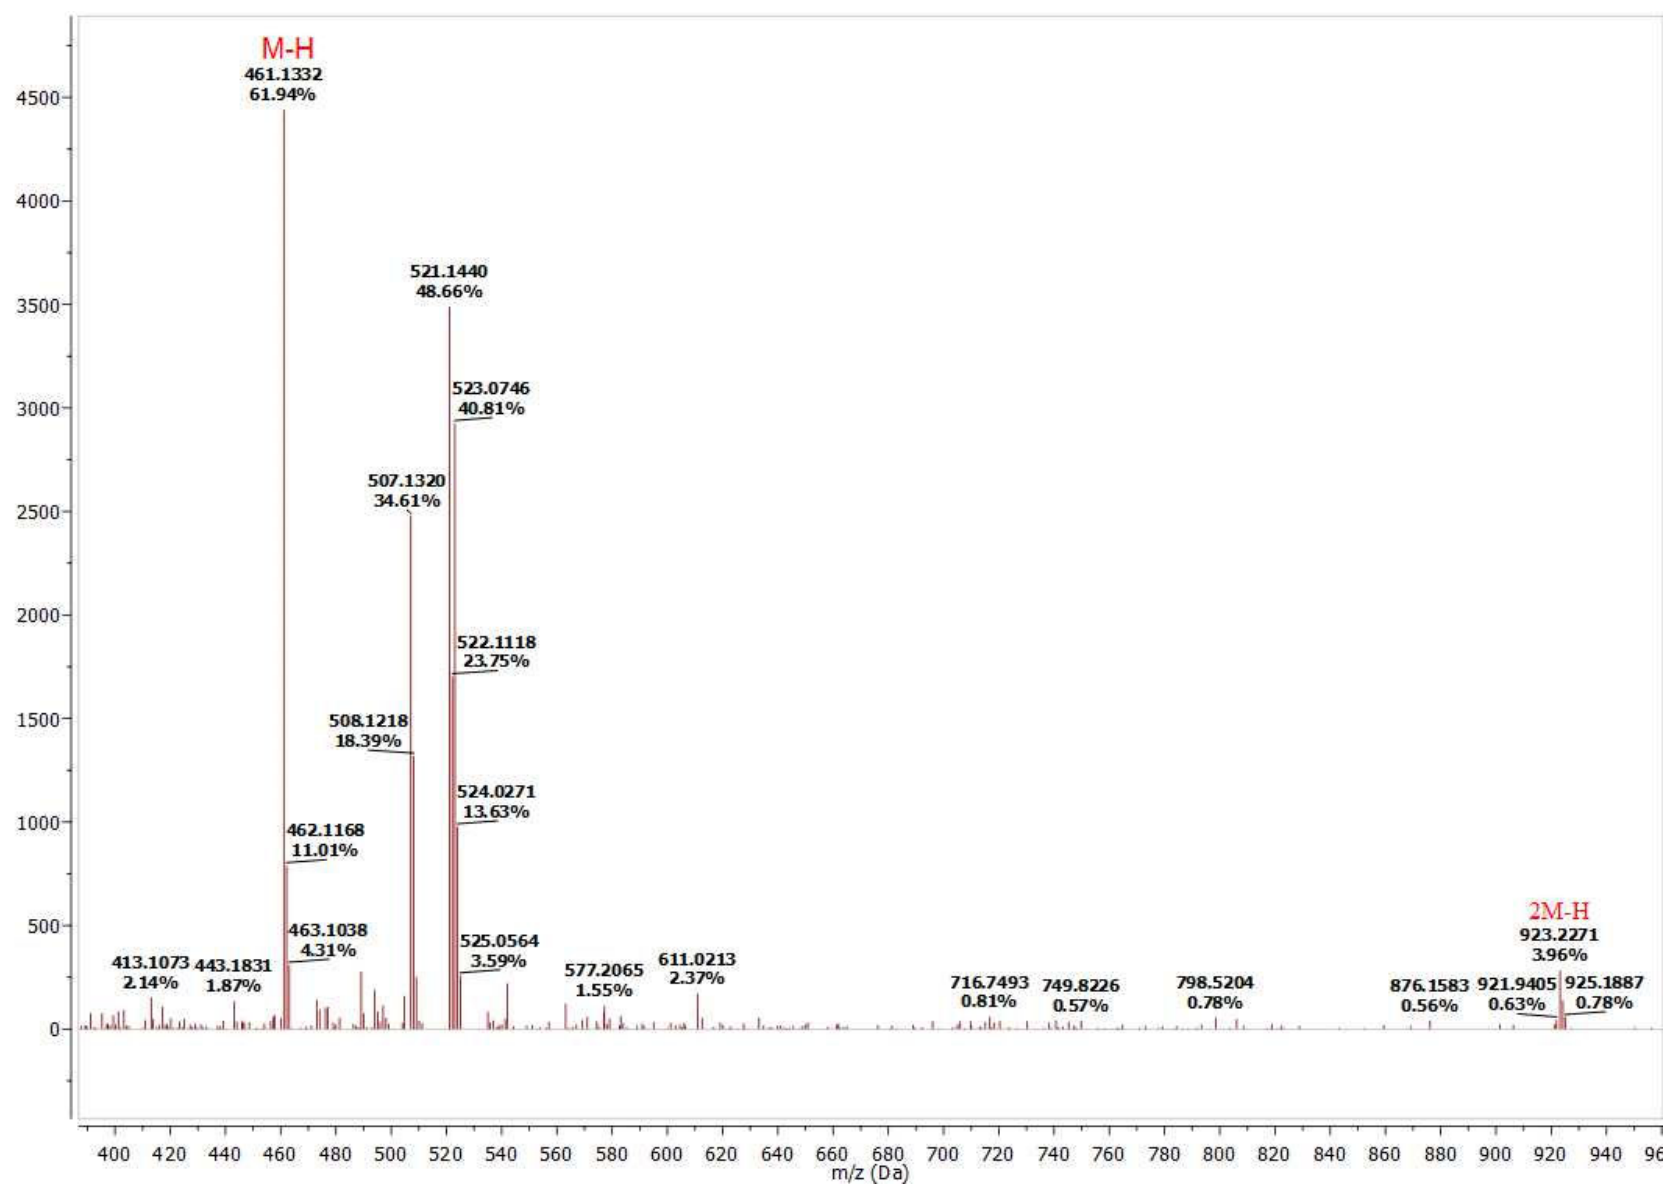

Figure S2: (-)-ESIMS of terretinin N (1)

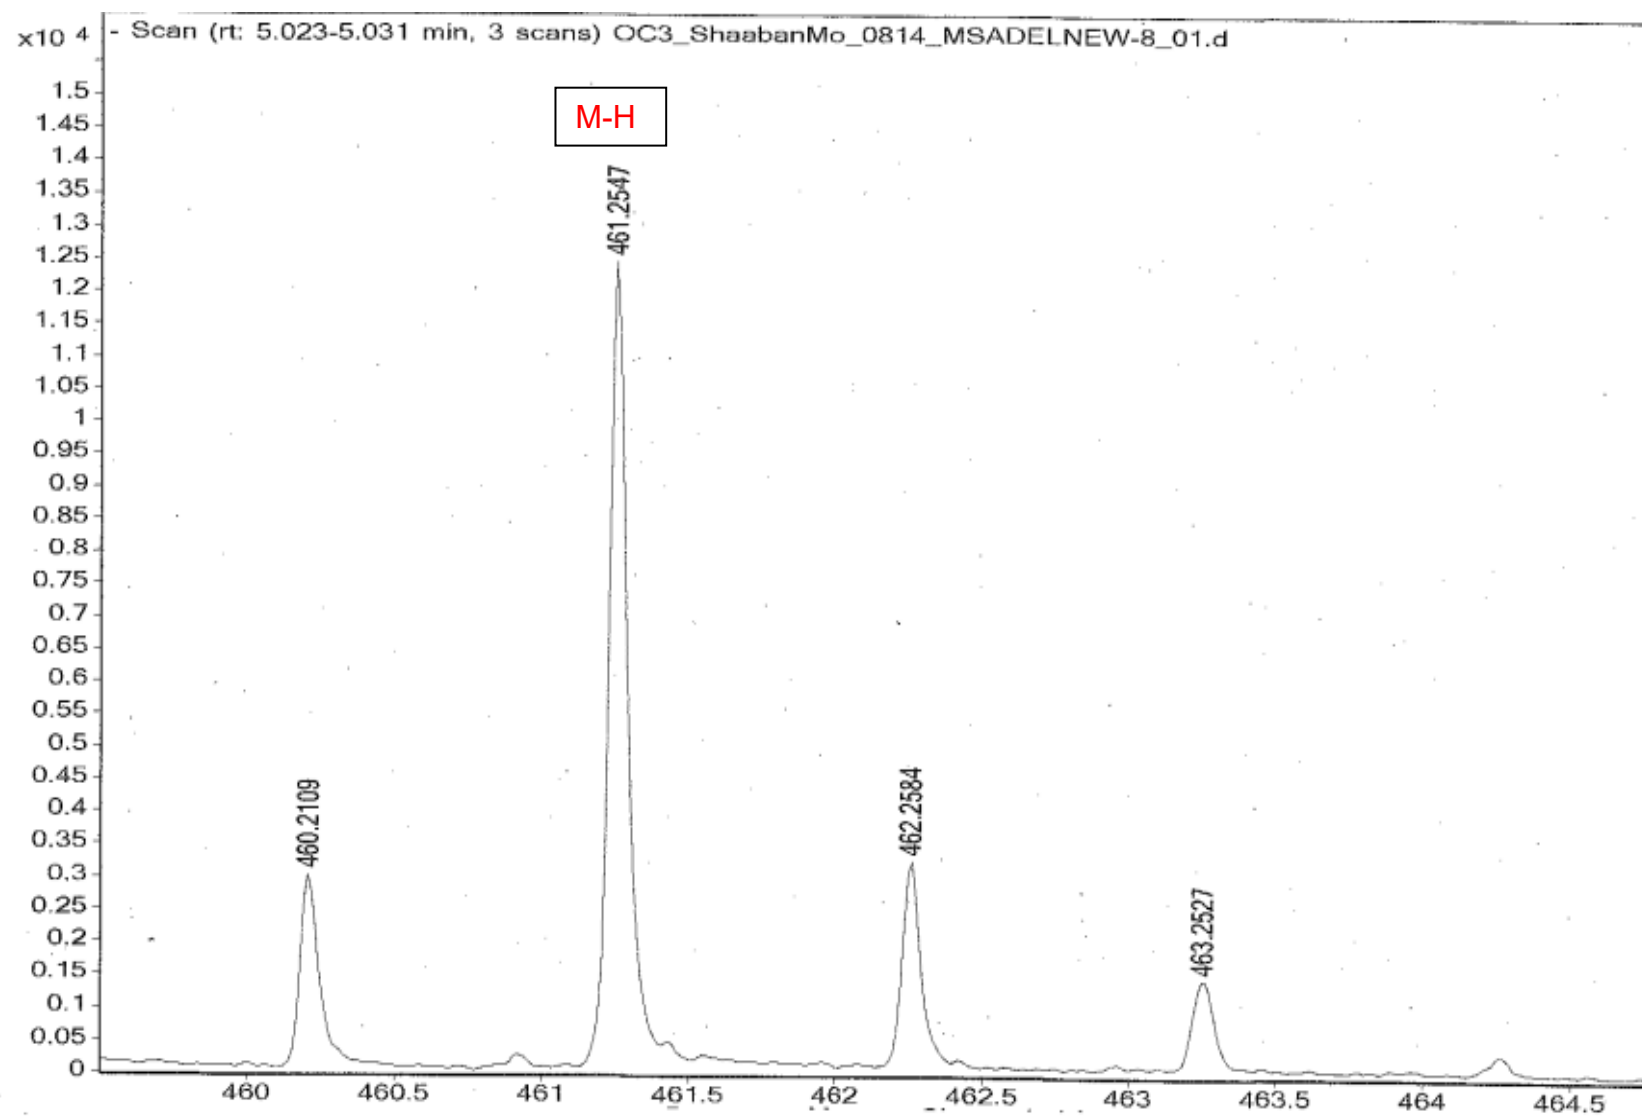

Figure S3: HR-ESI MS of terretonin N (1)

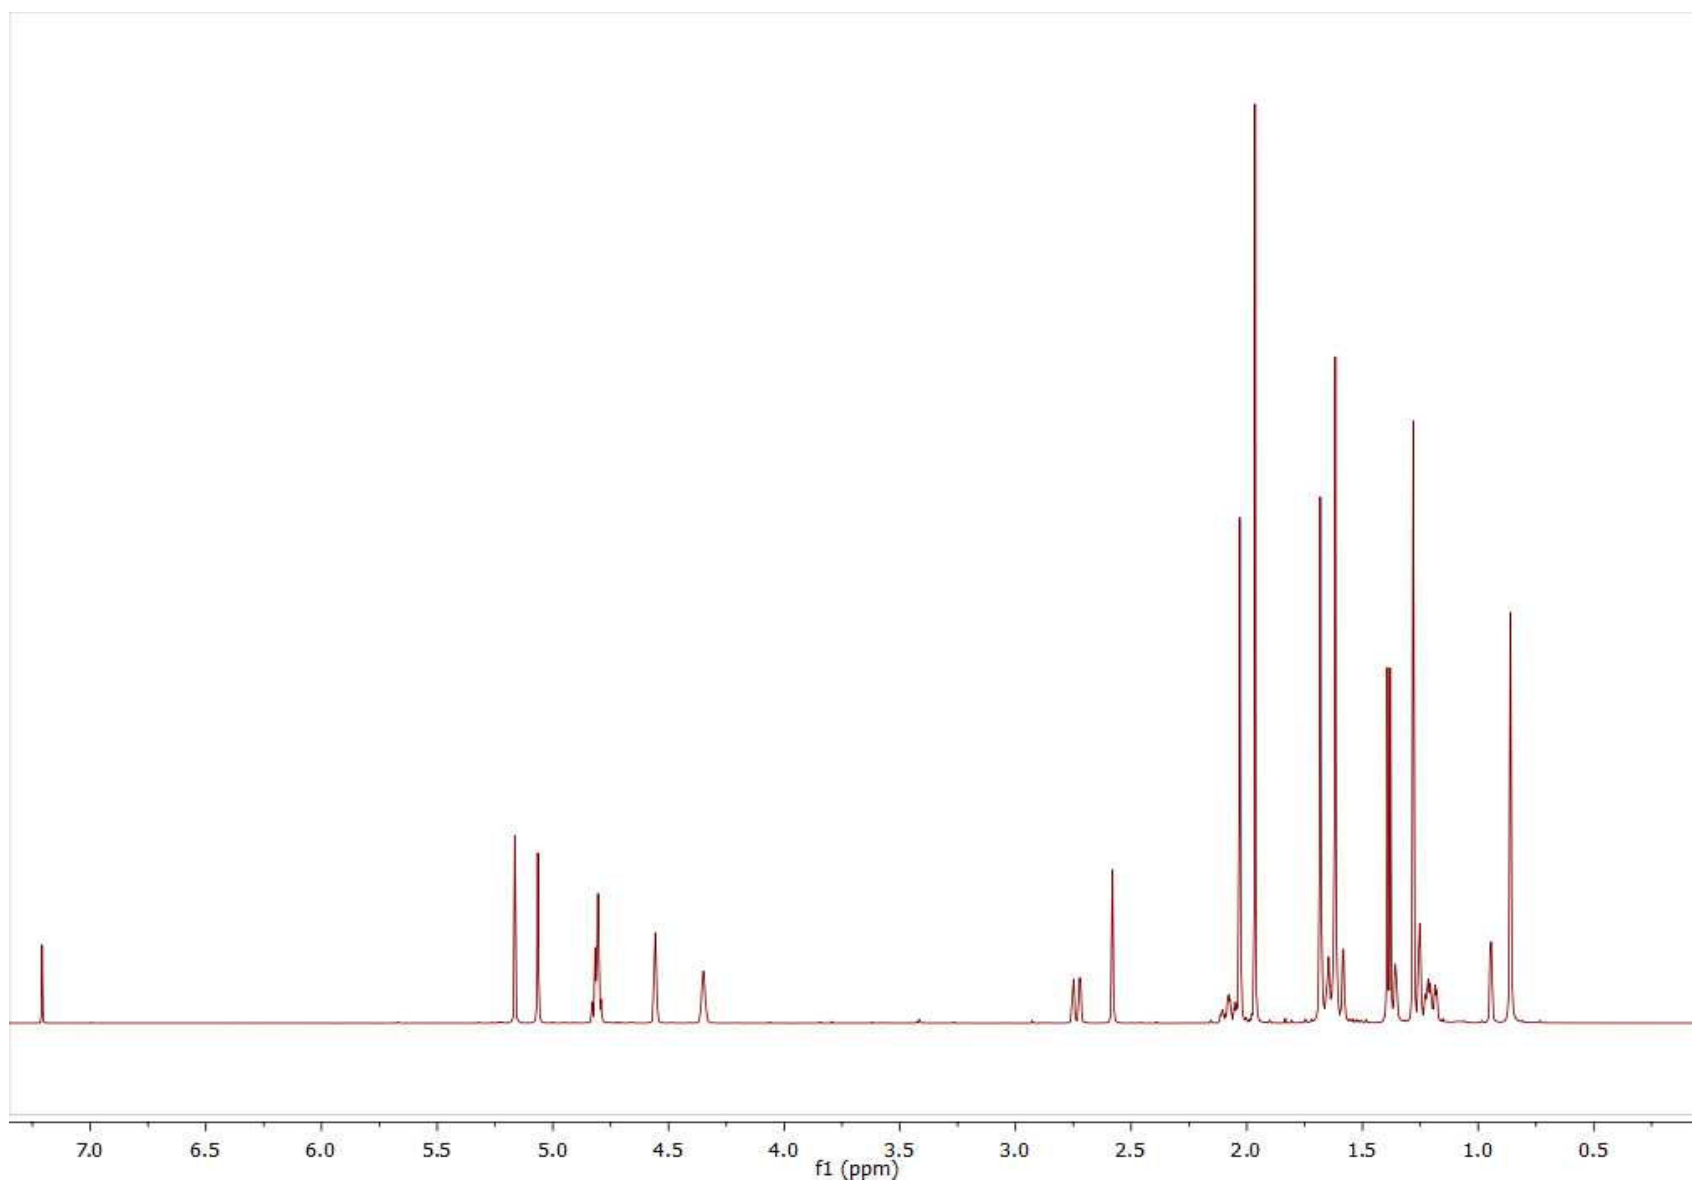

**Figure S4:**  $^1\text{H}$  NMR spectrum ( $\text{CDCl}_3$ , 500 MHz) of terretinin N (**1**)

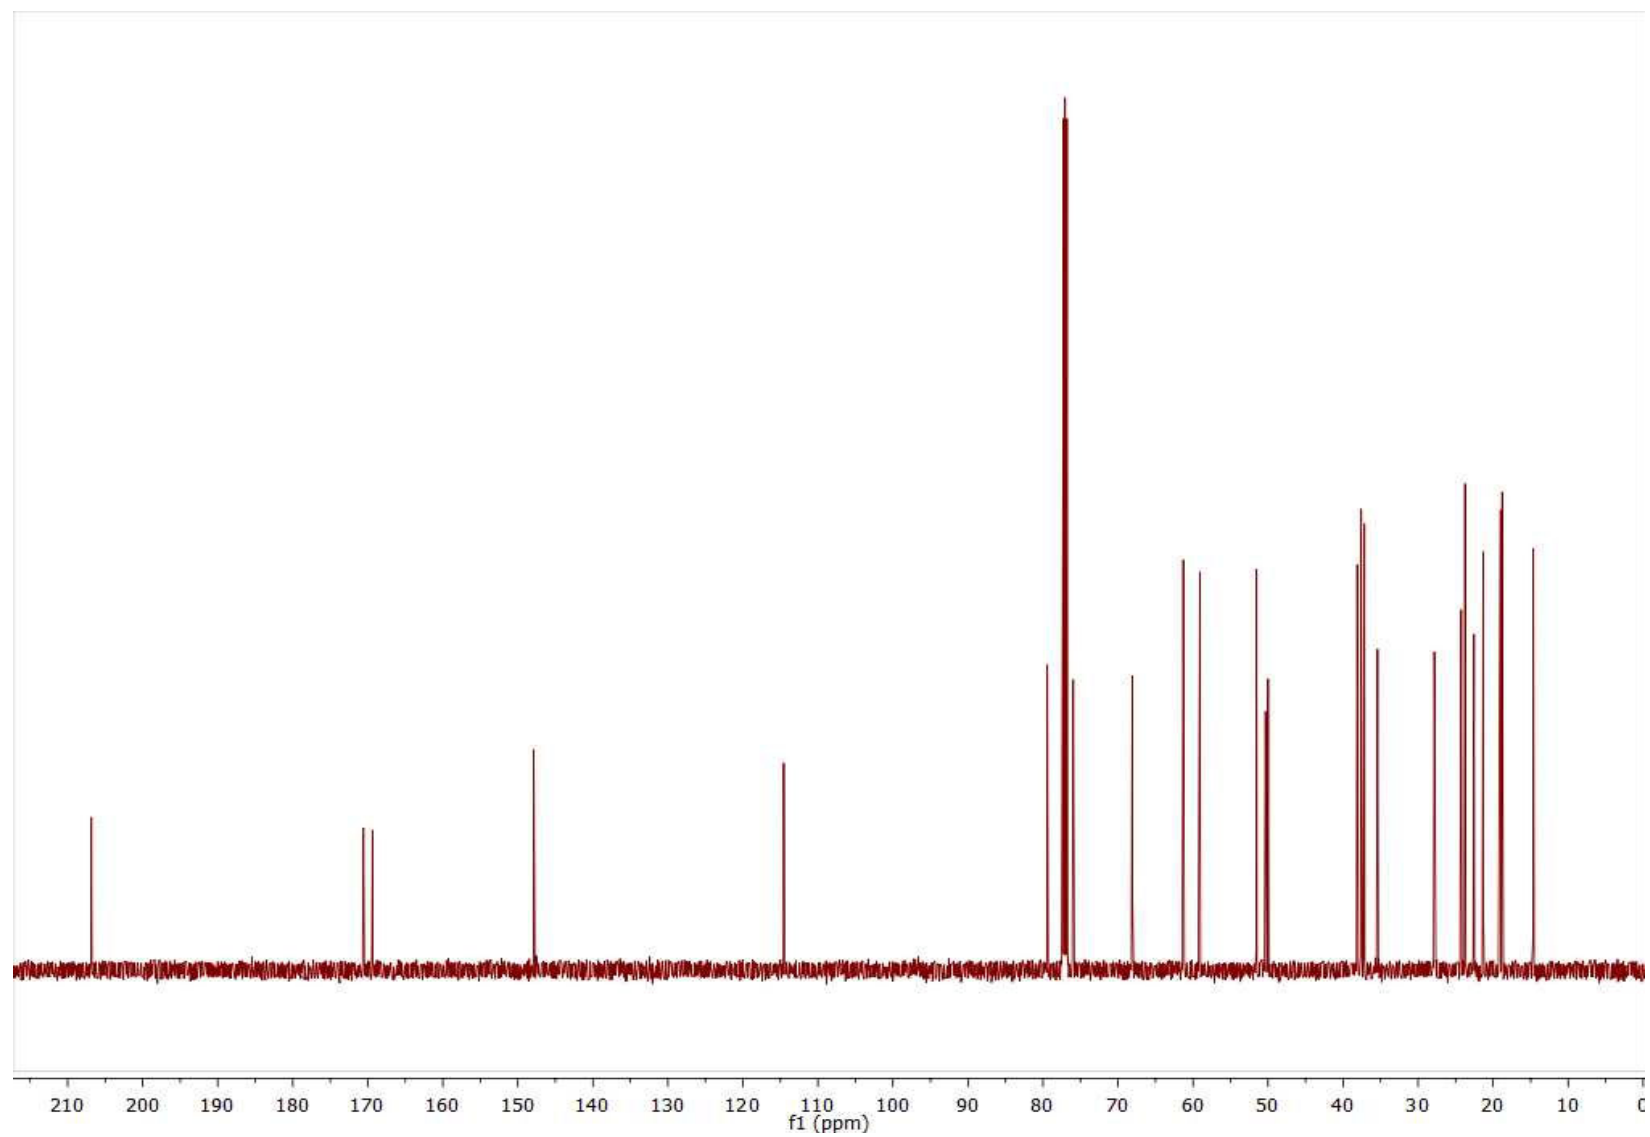

**Figure S5:**  $^{13}\text{C}$  NMR spectrum ( $\text{CDCl}_3$ , 125MHz) of terretonin N (**1**)



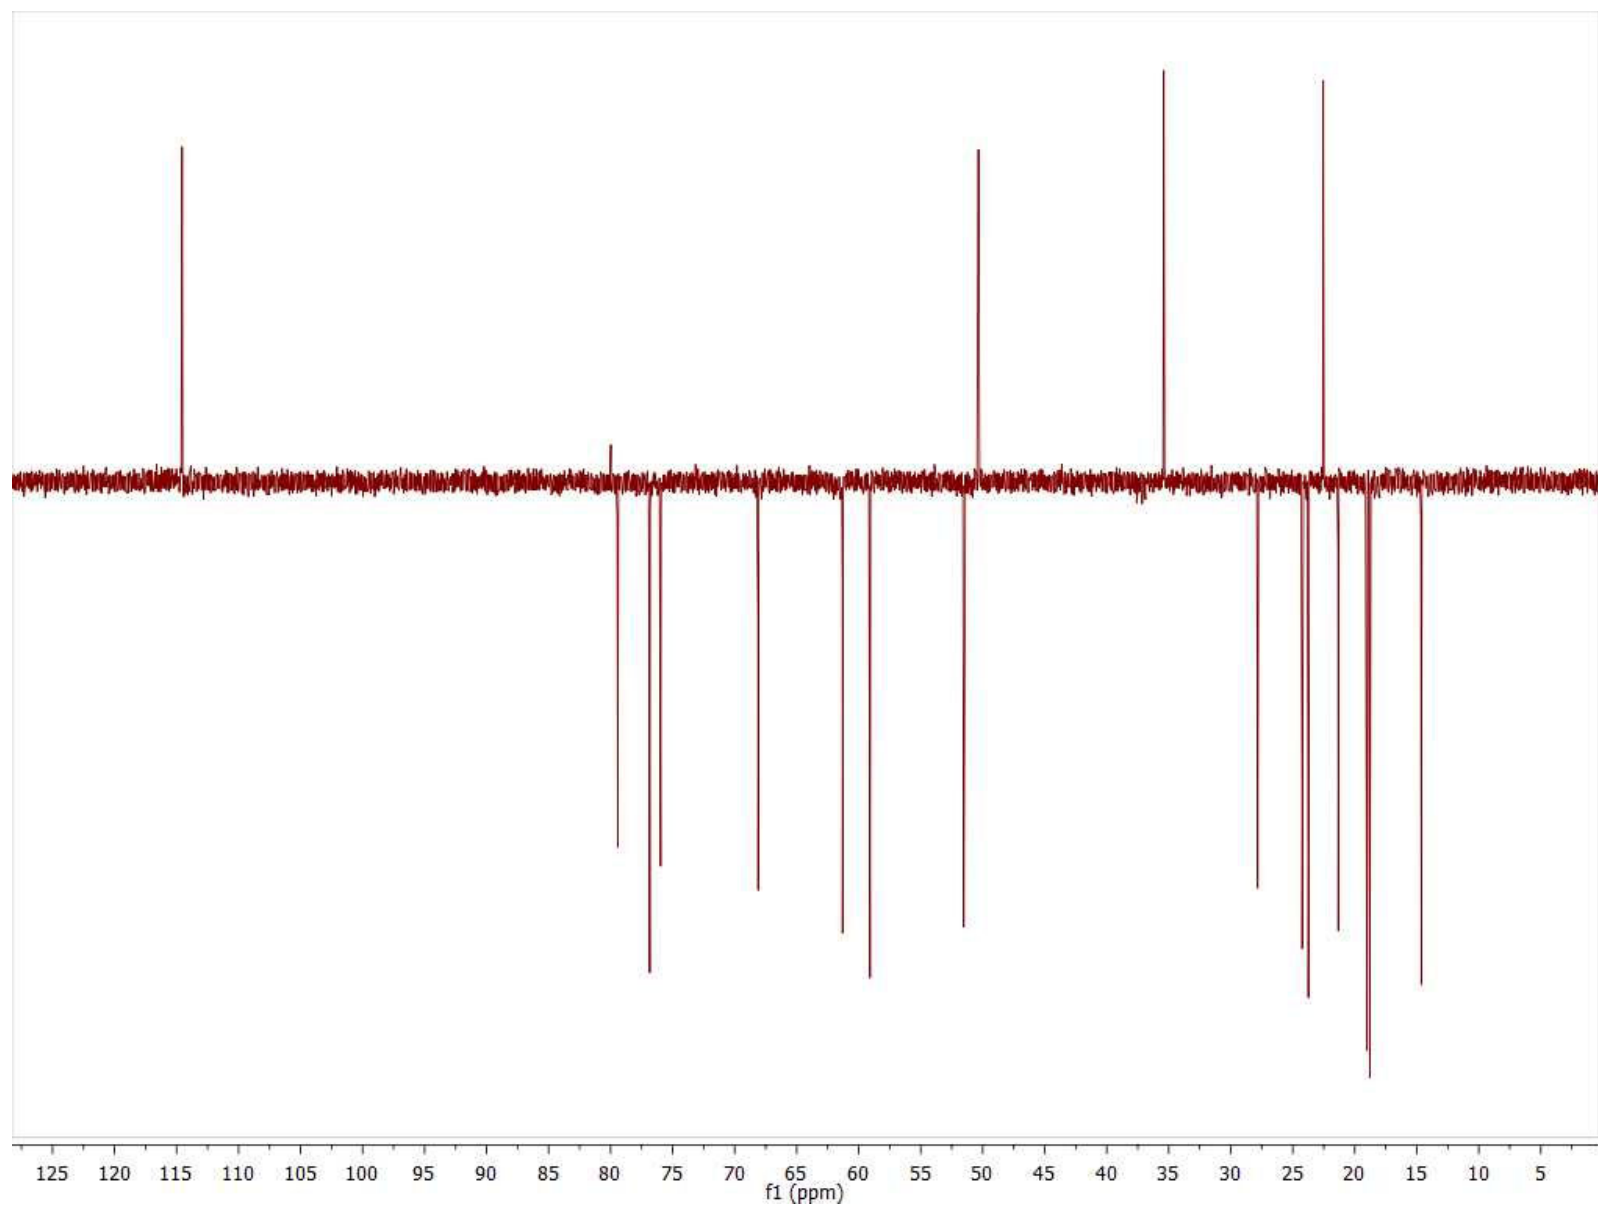

**Figure S6:** DEPT spectrum (CDCl<sub>3</sub>, 125 MHz) of terretonin N (**1**)



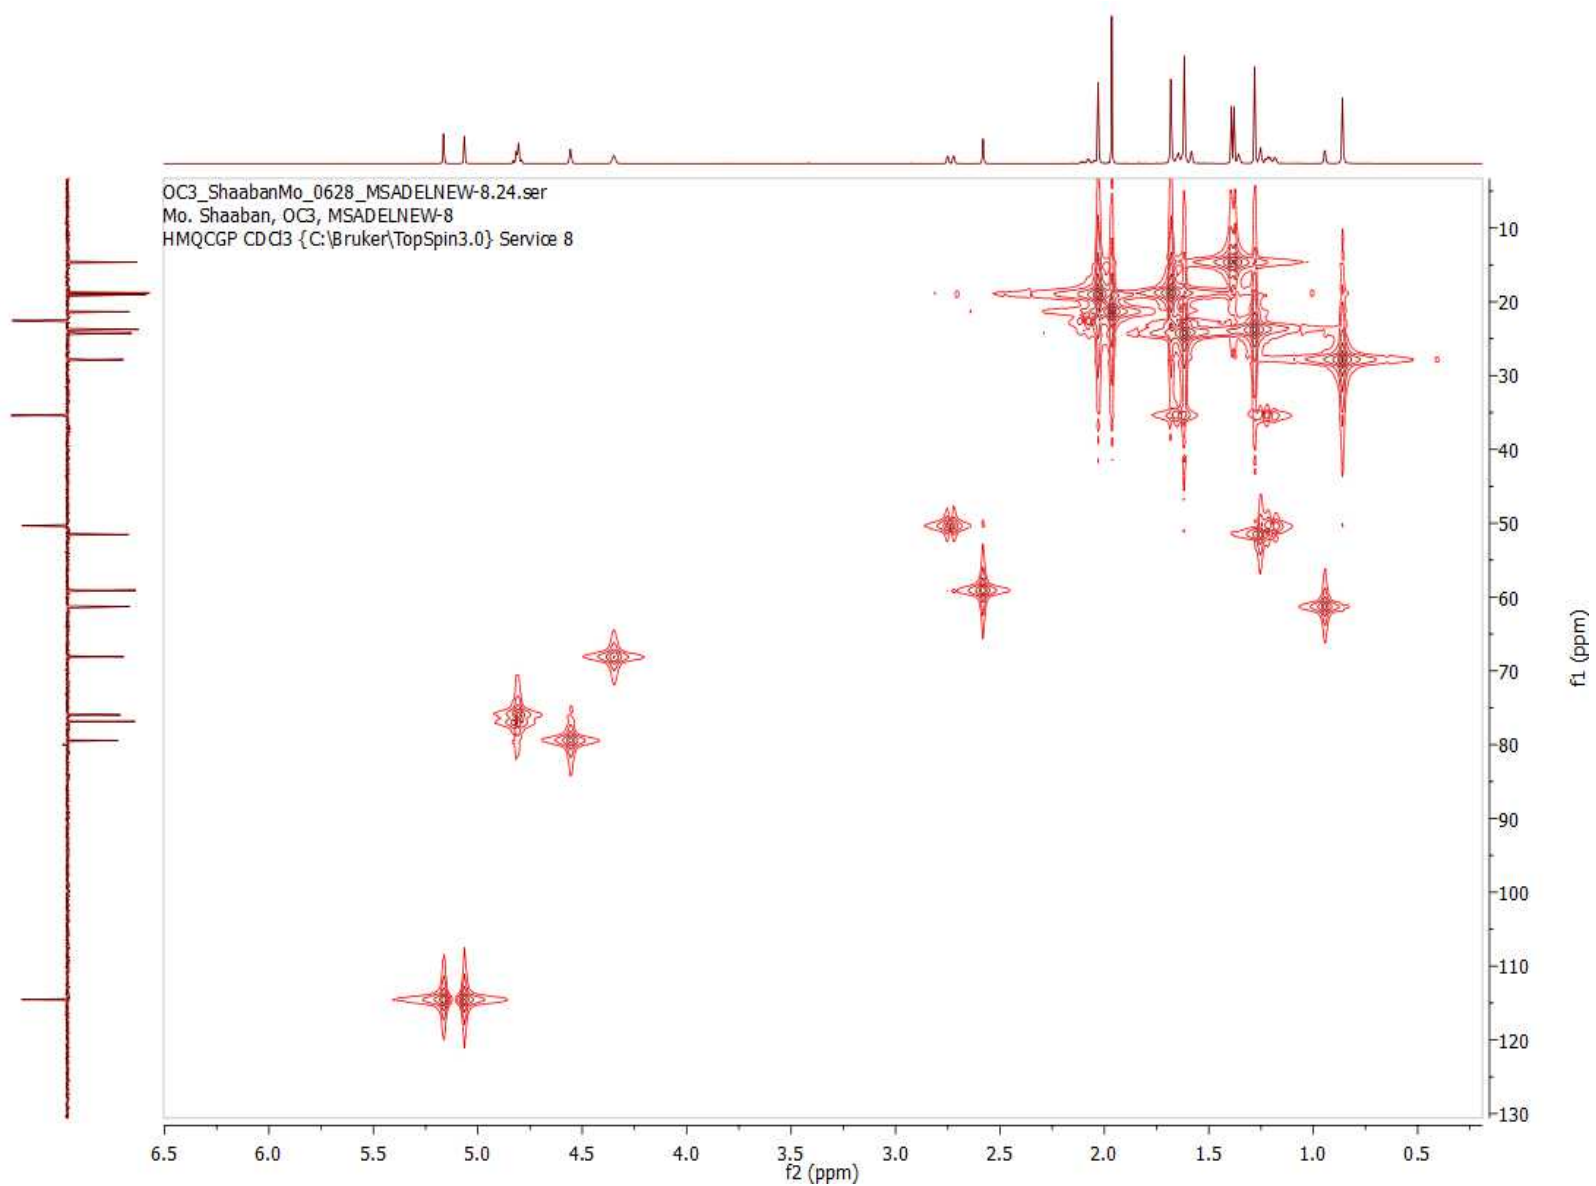

**Figure S8:** HMQC spectrum (CDCl<sub>3</sub>, 500 MHz) of terretonin N (**1**)

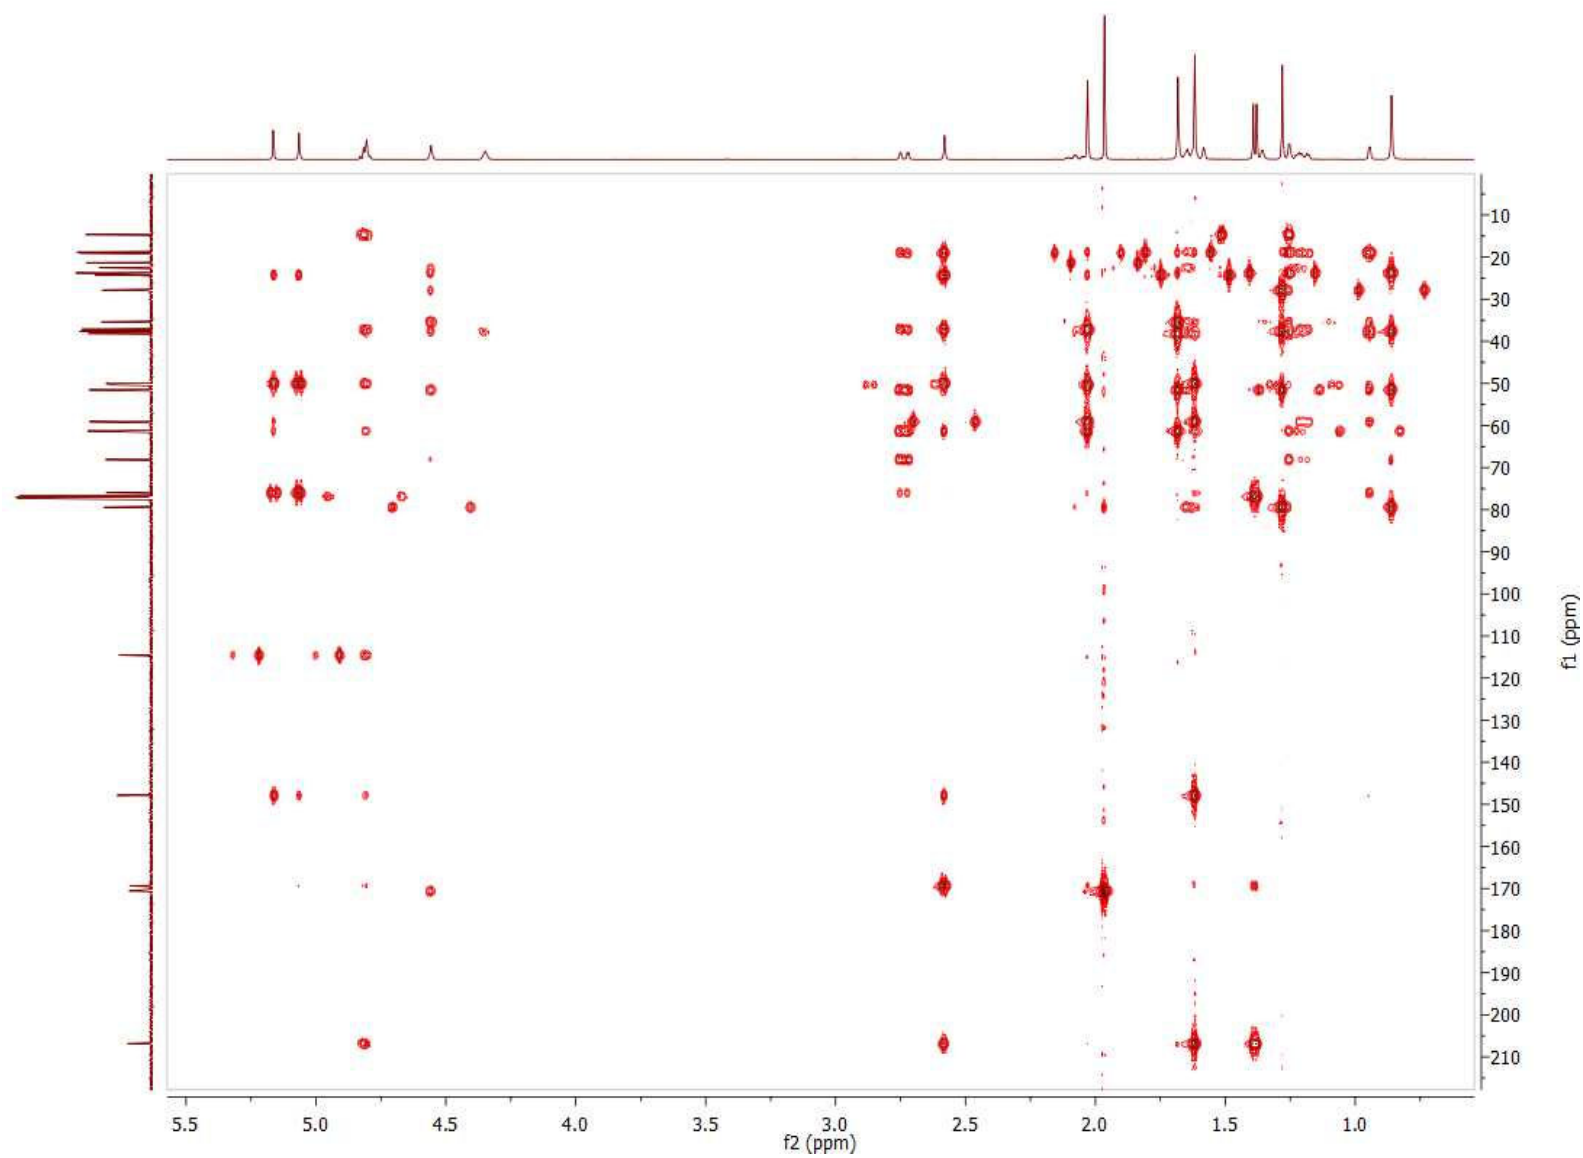

**Figure S9:** HMBC spectrum (CDCl<sub>3</sub>, 500 MHz) of terretinin N (**1**)

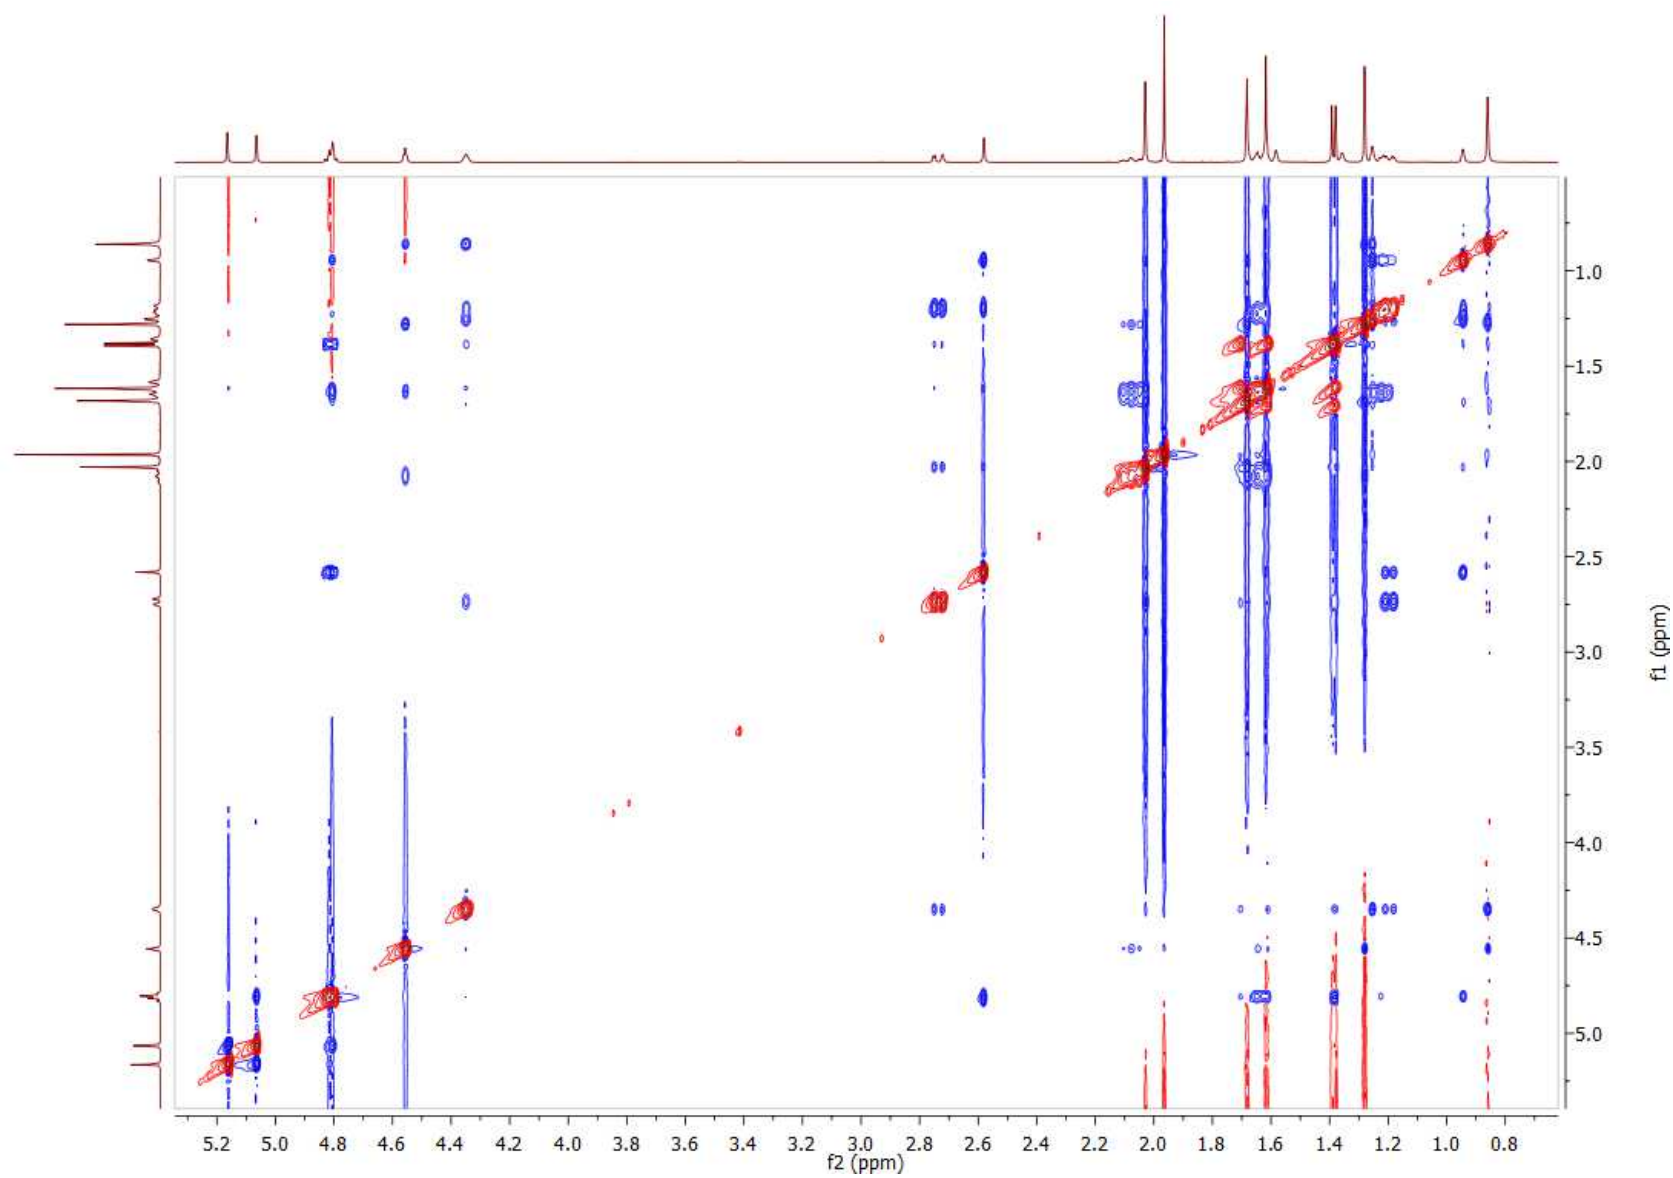

**Figure S10:** NOESY spectrum ( $\text{CDCl}_3$ , 500 MHz) of terretinin N (**1**)

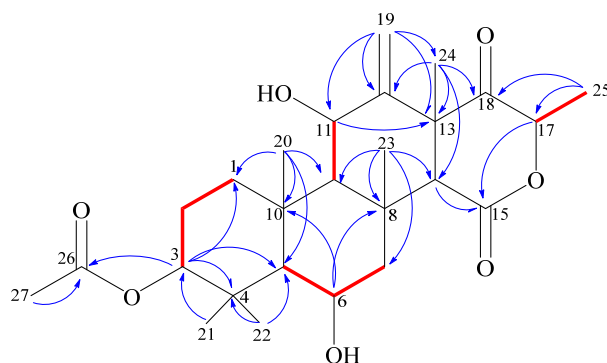

**Figure S11.** COSY (—) and key HMBC (↷) correlations of terretinin N (**1**)

**Table S1:**  $^{13}\text{C}$  (125 MHz) and  $^1\text{H}$  (500 MHz) NMR data of terretinin N (**1**) in  $\text{CDCl}_3$

| Position | $\delta_{\text{C}}$ [ppm] | $\delta_{\text{H}}$ [ppm] (m, $J$ [Hz]) | Position | $\delta_{\text{C}}$ [ppm] | $\delta_{\text{H}}$ [ppm] (m, $J$ [Hz]) |
|----------|---------------------------|-----------------------------------------|----------|---------------------------|-----------------------------------------|
| 1        | 35.4                      | 1.65 (m), 1.21 (m)                      | 14       | 59.1                      | 2.58 (s)                                |
| 2        | 22.5                      | 1.95 (m), 1.65 (m)                      | 15       | 169.4                     | -                                       |
| 3        | 79.4                      | 4.55 (t, 3.0)                           | 17       | 76.8                      | 4.81 (m)                                |
| 4        | 37.6                      | -                                       | 18       | 206.8                     | -                                       |
| 5        | 51.5                      | 1.25 (m)                                | 19       | 114.5                     | 5.16 (s), 5.06 (s)                      |
| 6        | 68.1                      | 4.35 (t, 3.0)                           | 20       | 18.8                      | 1.68 (s)                                |
| 7        | 50.3                      | 2.74 (dd, 14.5, 2.7), 1.19 (m)          | 21       | 27.8                      | 0.86 (s)                                |
| 8        | 37.1                      | -                                       | 22       | 23.7                      | 1.28 (s)                                |
| 9        | 61.3                      | 0.95 (d, 2.4)                           | 23       | 19.0                      | 2.03 (s)                                |
| 10       | 38.1                      | -                                       | 24       | 24.2                      | 1.62 (s)                                |
| 11       | 76.0                      | 4.81 (m)                                | 25       | 14.6                      | 1.38 (d, 6.4)                           |
| 12       | 147.9                     | -                                       | 26       | 170.6                     | -                                       |
| 13       | 50.0                      | -                                       | 27       | 21.3                      | 1.96 (s)                                |

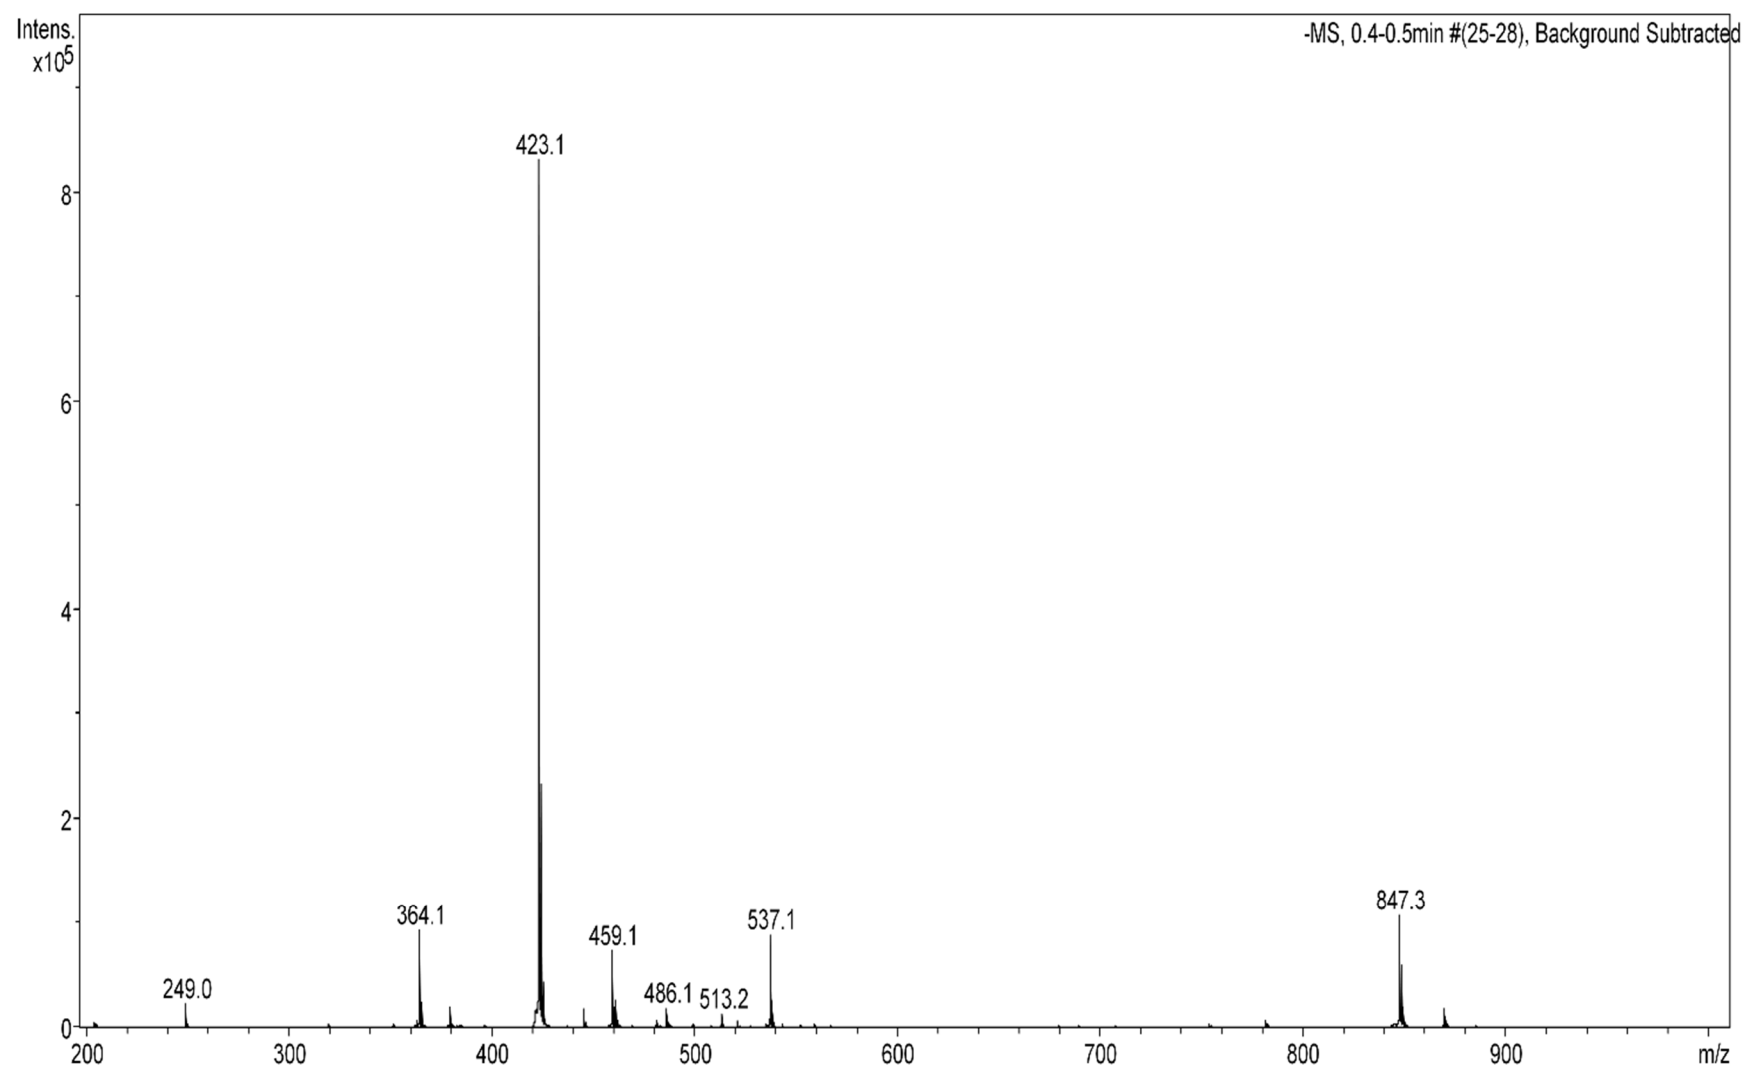

**Figure S12:** (-)-ESIMS of butyrolactone I (**2**)

OC3\_ShaabanMo\_0917\_MSDA-3a.10.1.1r  
Mo. Shaaban, OC3, MSDA-3a  
PROTON Acetone {C:\Bruker\TopSpin3.0} Service 15

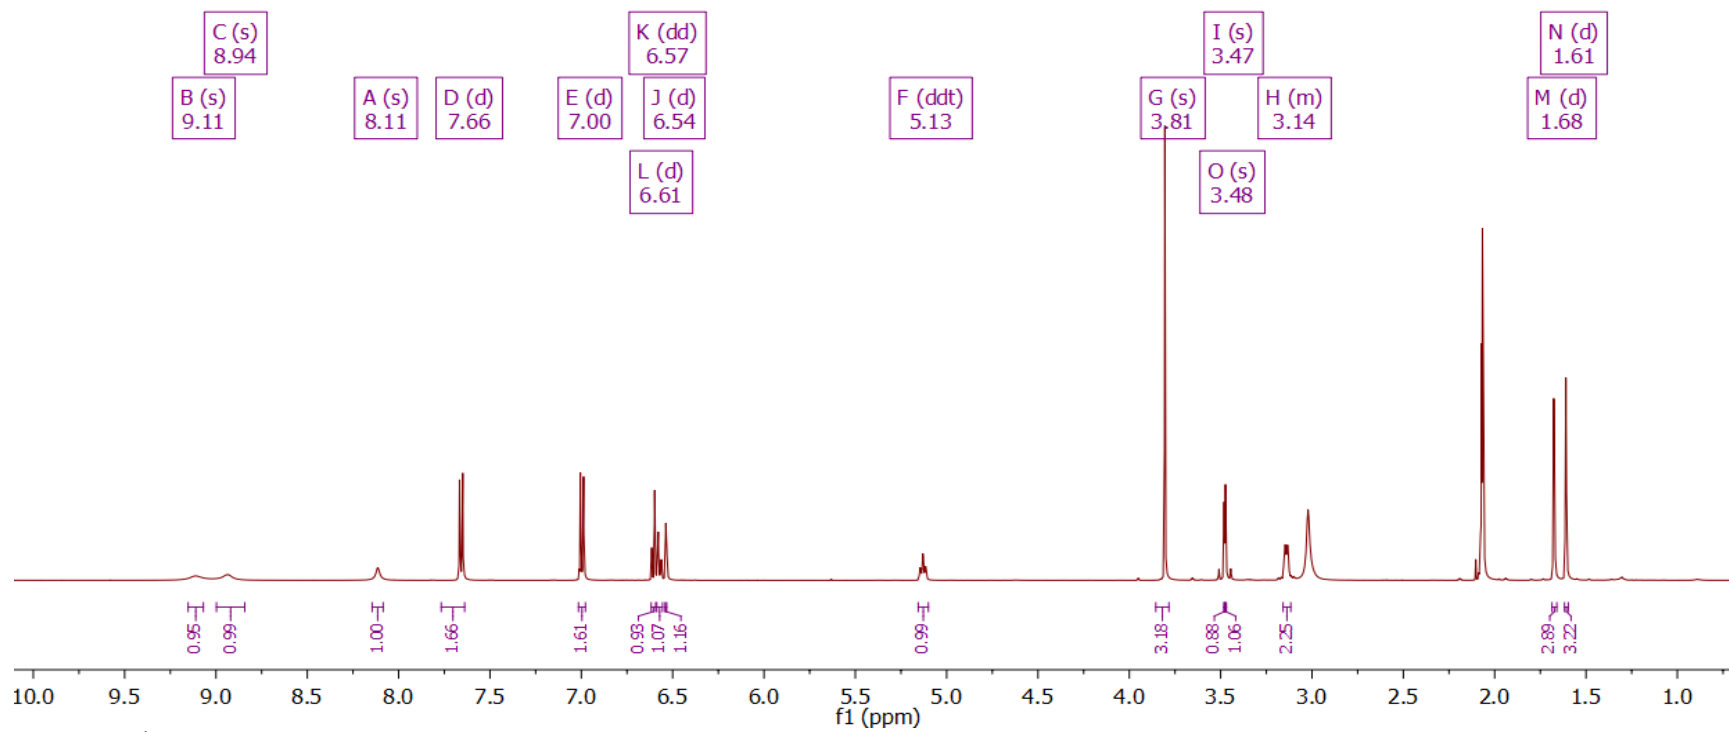

**Figure S13:** <sup>1</sup>H NMR (500 MHz, Acetone-d<sub>6</sub>) of butyrolactone I (2)



OC3\_ShaabanMo\_0917\_MSDA-3a.14.1.1r  
Mo. Shaaban, OC3, MSDA-3a  
C13CPD Acetone {C:\Bruker\TopSpin3.0} Service 15

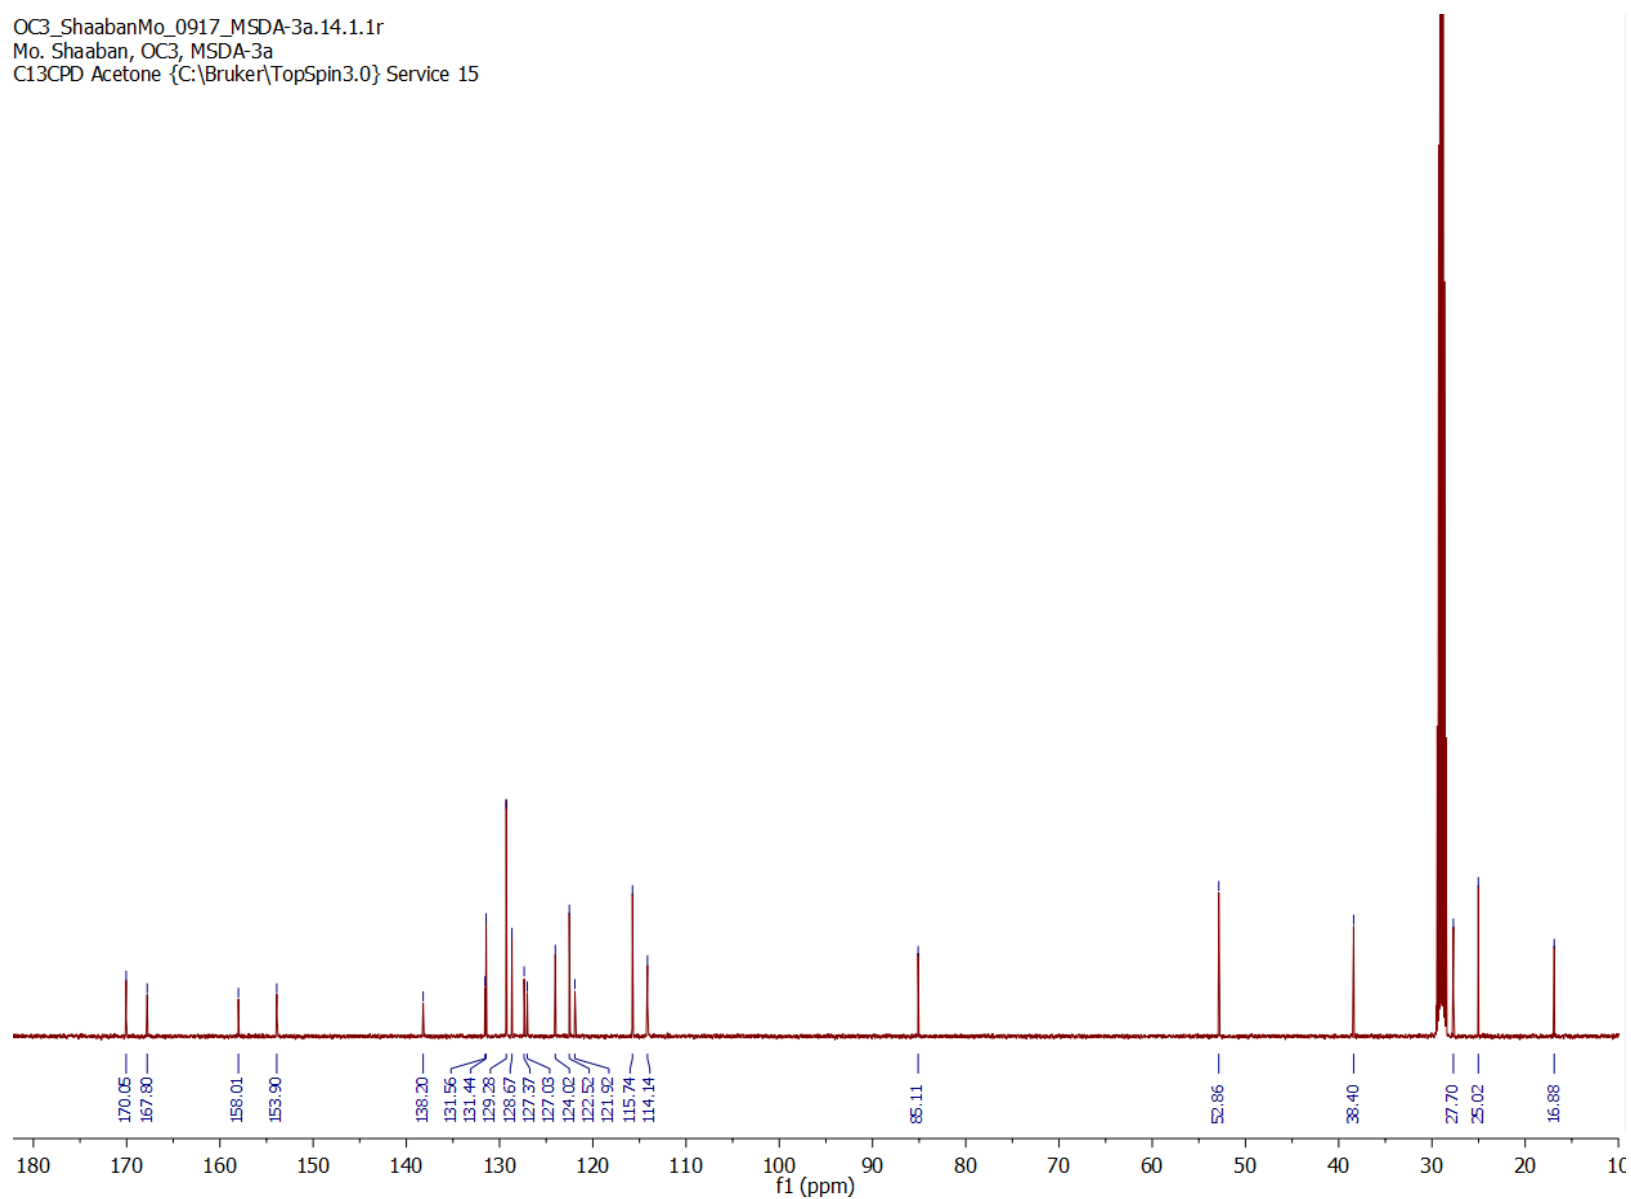

**Figure S14:** <sup>13</sup>C NMR (125 MHz, Acetone-d<sub>6</sub>) of butyrolactone I (2)

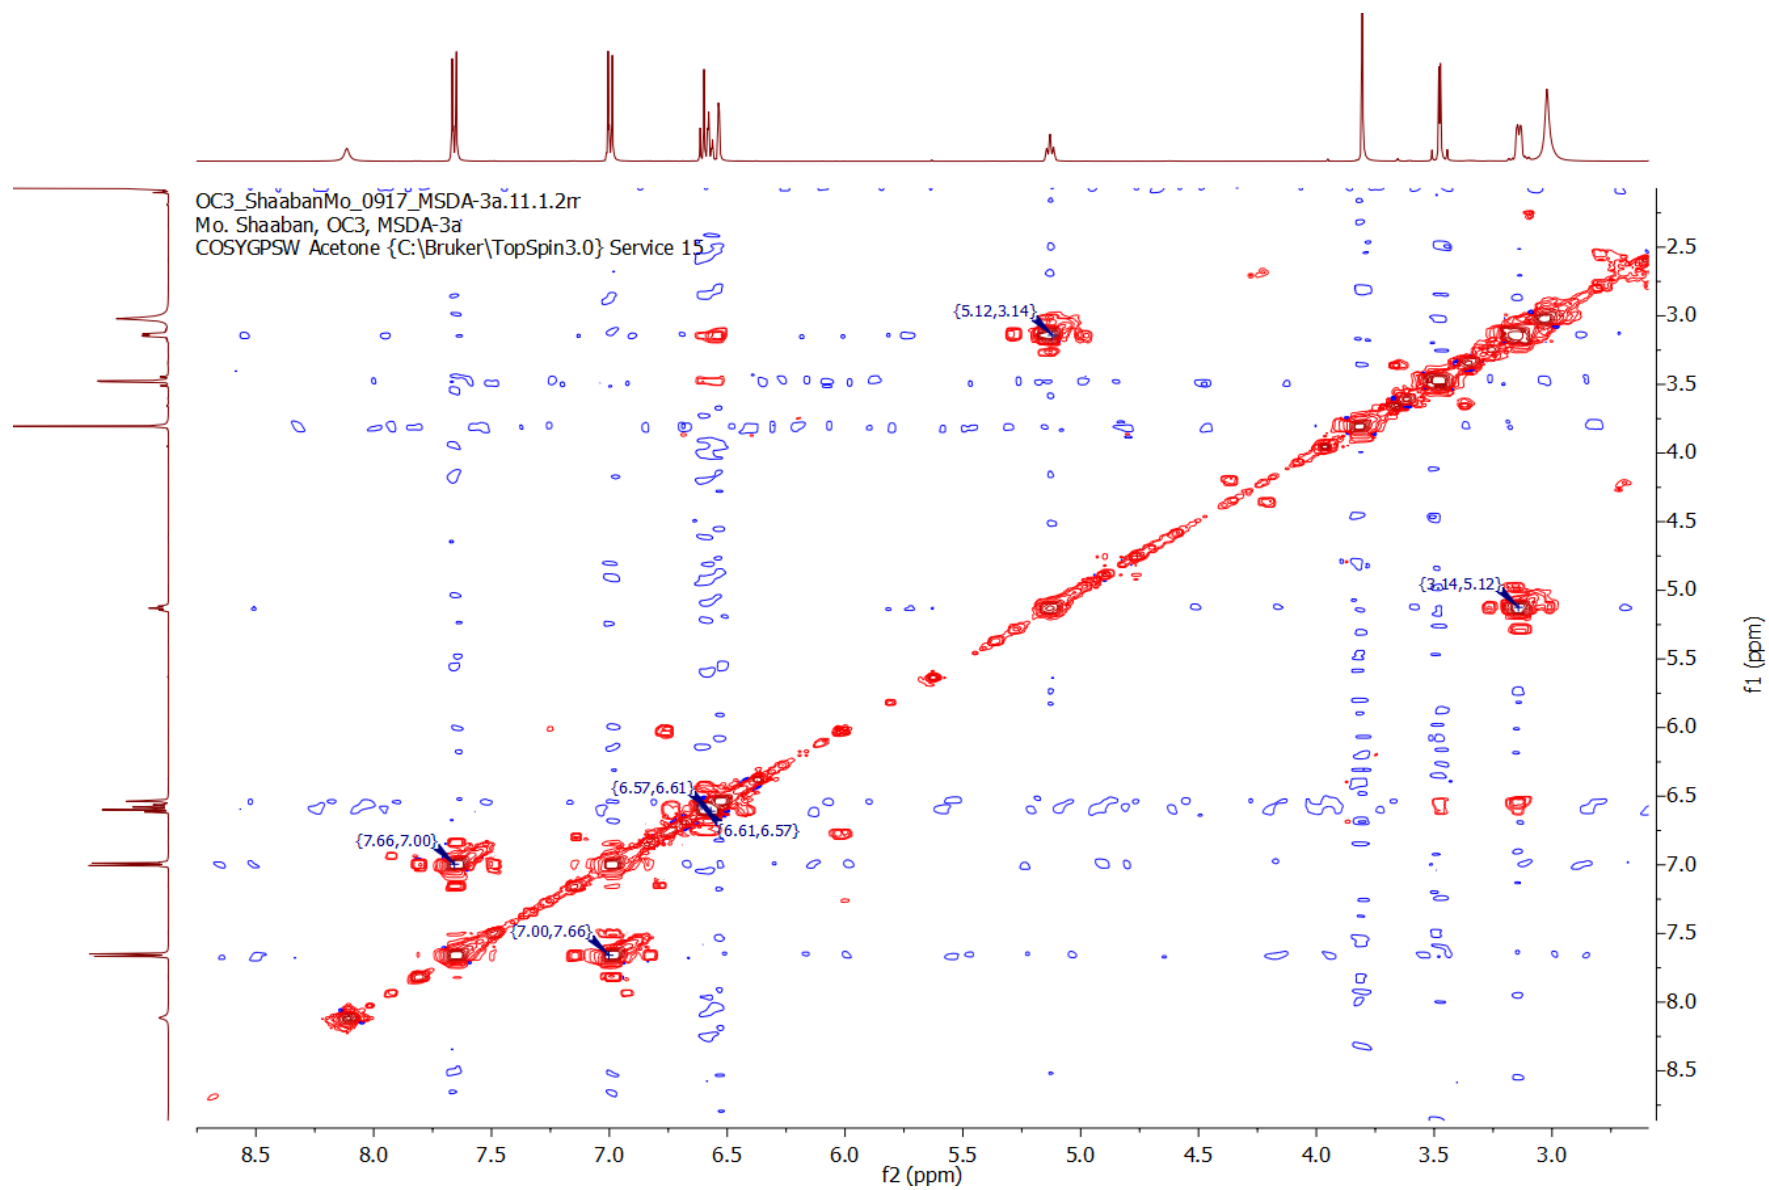

**Figure S15:** H-H-COSY spectrum of butyrolactone I (2)

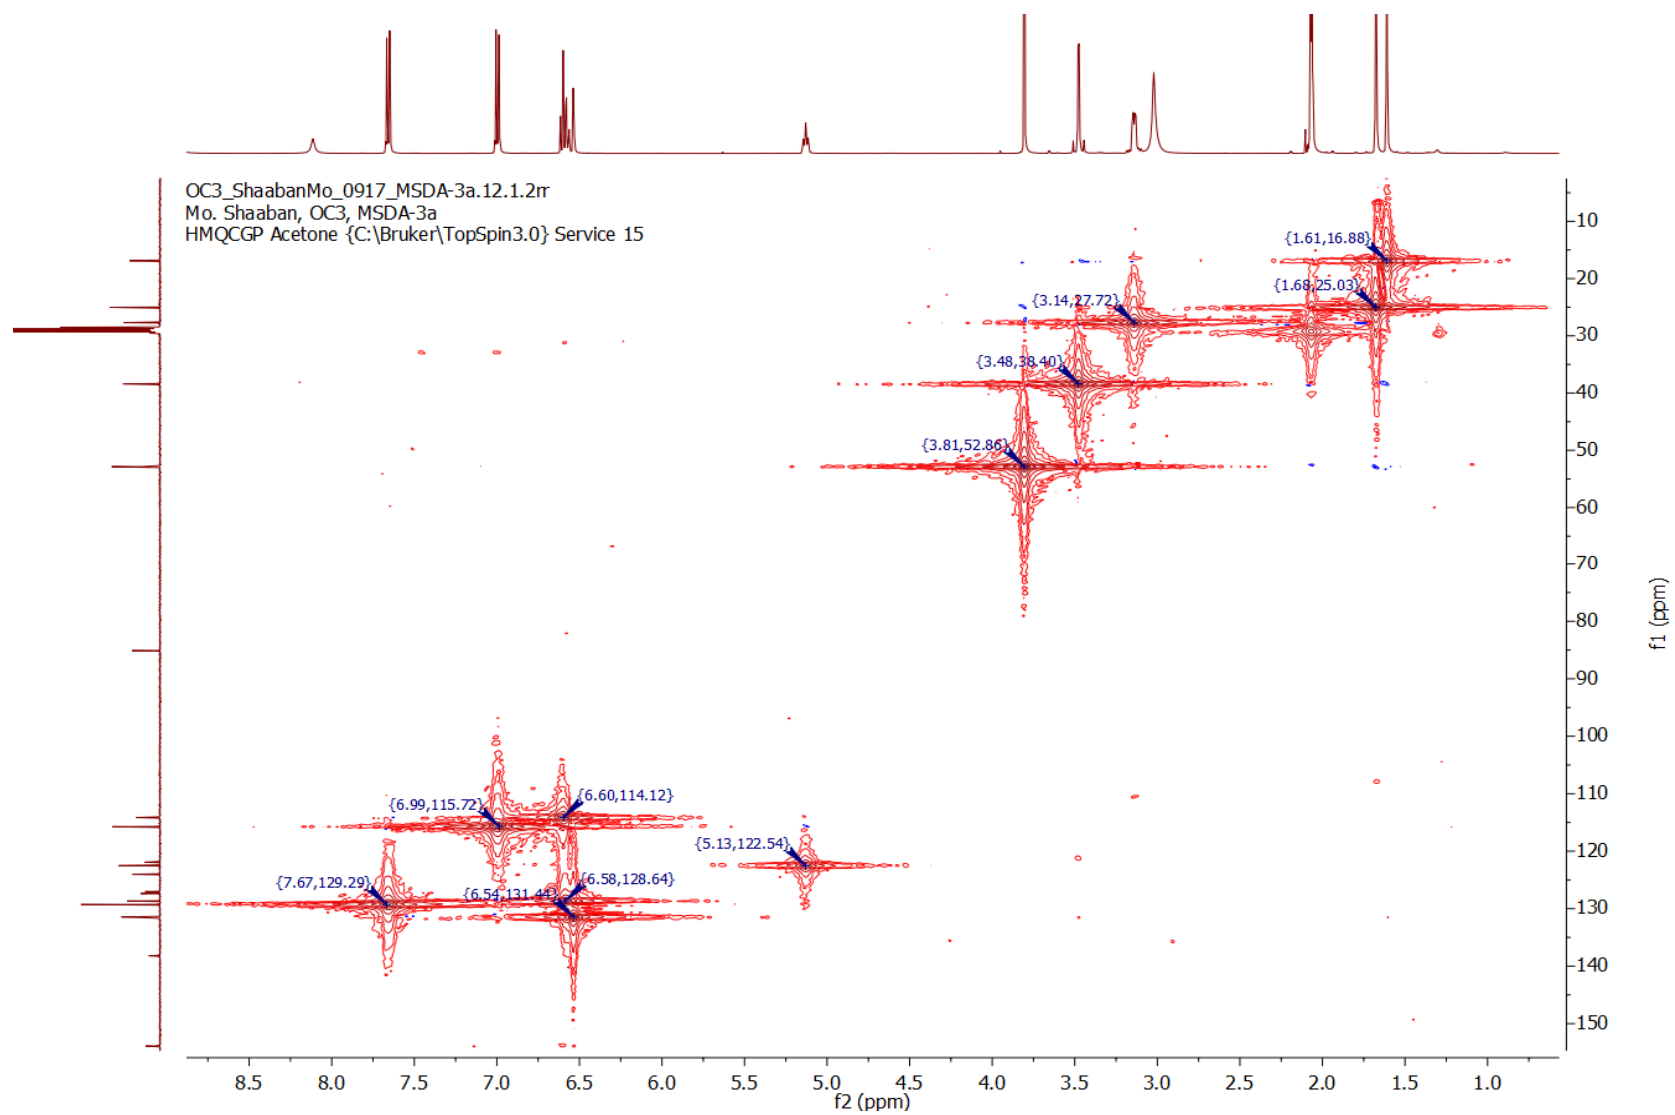

Figure S16: HMQC spectrum of butyrolactone I (2)

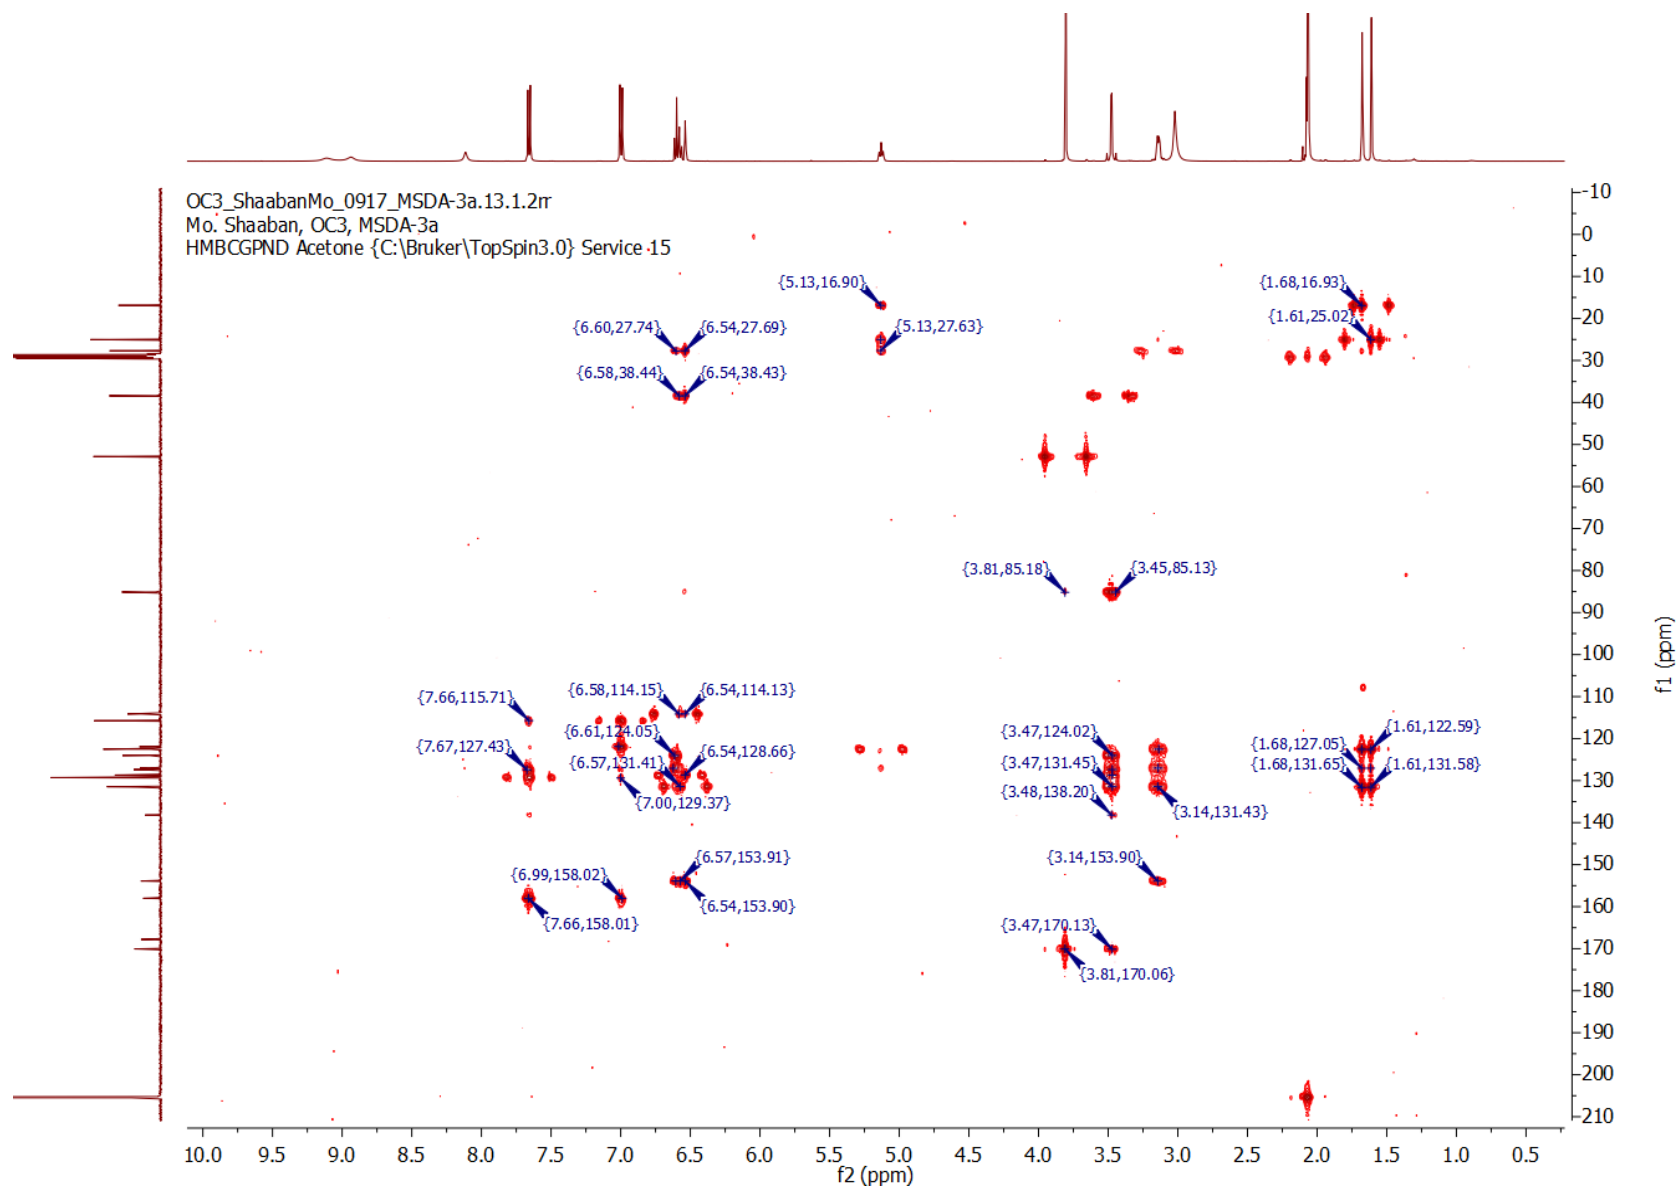

Figure S17: HMBC spectrum of butyrolactone I (2)

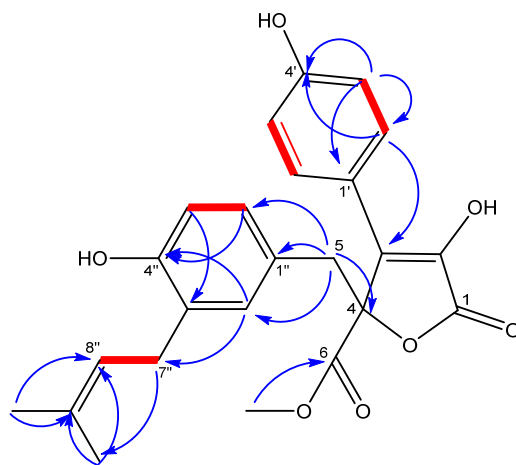

**Figure S18:** H,H COSY ( — ) and selected HMBC ( → ) correlations of butyrolactone I (**2**)

**Table S2:**  $^{13}\text{C}$  (125 MHz) and  $^1\text{H}$  (500 MHz) NMR data of butyrolactone I (**2**) in Acetone- $d_6$ :

| Position | $\delta_{\text{C}}$ (ppm) | $\delta_{\text{H}}$ (J in Hz) | position | $\delta_{\text{C}}$ (ppm) | $\delta_{\text{H}}$ (J in Hz) |
|----------|---------------------------|-------------------------------|----------|---------------------------|-------------------------------|
| 1        | 167.8                     | -                             | 1''      | 124.0                     | -                             |
| 2        | 138.2                     | -                             | 2''      | 131.4                     | 6.54 (d,2.2)                  |
| 3        | 127.4                     | -                             | 3''      | 127                       | -                             |
| 4        | 85.1                      | -                             | 4''      | 153.9                     | -                             |
| 5        | 38.4                      | 3.48 (s), 3.47 (s)            | 5''      | 114.1                     | 6.61(d,8.1)                   |
| 6        | 170.1                     | -                             | 6''      | 128.7                     | 6.57(dd,8.2,2.2)              |
| 7        | 52.9                      | 3.81 (s)                      | 7''      | 27.7                      | 3.14(m)                       |
| 1'       | 121.9                     | -                             | 8''      | 122.5                     | 5.13(ddt,8.8,5.9,1.5)         |
| 2',6'    | 129.3                     | 7.66(d,8.9)                   | 9''      | 131.6                     | -                             |
| 3',5'    | 115.7                     | 7.0(d,8.8)                    | 10''     | 25.0                      | 1.68(d,1.4)                   |
| 4'       | 158.0                     | -                             | 11''     | 16.9                      | 1.61(d,1.2)                   |
